# Supplementary material
Source: PubMed Central journal article supplement (PMC4291344)
Supplement: AAC.04122-14_zac001153555so1.pdf [file AAC.04122-14_zac001153555so1.pdf]

**Table S1.** Fluctuation analysis of the number of colicin resistant *E.coli* (EC<sup>CR</sup>) obtained on selective plates containing colicins E3+E8 \*

| Culture no. | Number of EC <sup>CR</sup> colonies per plate |              |               |              |               |              |
|-------------|-----------------------------------------------|--------------|---------------|--------------|---------------|--------------|
|             | Small culture                                 | Bulk culture | Small culture | Bulk culture | Small culture | Bulk culture |
| 1           | 0                                             | 82           | 188           | 68           | 8             | 48           |
| 2           | 26                                            | 80           | 11            | 53           | 3             | 49           |
| 3           | 5                                             | 87           | 0             | 37           | 128           | 45           |
| 4           | 87                                            | 80           | 34            | 45           | 5             | 44           |
| 5           | 9                                             | 93           | 13            | 59           | 82            | 45           |
| 6           | 1                                             | 97           | 5             | 48           | 5             | 44           |
| 7           | 32                                            | 68           | 21            | 35           | 7             | 51           |
| 8           | 4                                             | 82           | 3             | 53           | 17            | 50           |
| 9           | 86                                            | 69           | 15            | 48           | 4             | 54           |
| 10          | 4                                             | 71           | 0             | 65           | 4             | 35           |
| Mean        | 25.4                                          | 80.9         | 29.0          | 51.1         | 26.3          | 46.5         |
| Variance    | 1150.3                                        | 94.8         | 3231.1        | 118.1        | 1853.8        | 27.4         |

\* Data represented here is obtained from three independent experiments

**Table S2.** Fluctuation analysis of the number of colicin resistant *E.coli* (EC<sup>CR</sup>) obtained on selective plates containing colicins E2+E3 \*

| Culture no. | Number of EC <sup>CR</sup> colonies per plate |              |               |              |               |              |
|-------------|-----------------------------------------------|--------------|---------------|--------------|---------------|--------------|
|             | Small culture                                 | Bulk culture | Small culture | Bulk culture | Small culture | Bulk culture |
| 1           | 97                                            | 39           | 17            | 60           | 152           | 53           |
| 2           | 6                                             | 42           | 8             | 99           | 71            | 34           |
| 3           | 21                                            | 36           | 80            | 75           | 102           | 35           |
| 4           | 6                                             | 25           | 2             | 56           | 7             | 44           |
| 5           | 32                                            | 33           | 111           | 66           | 12            | 54           |
| 6           | 62                                            | 21           | 26            | 61           | 16            | 47           |
| 7           | 19                                            | 20           | 13            | 59           | 4             | 46           |
| 8           | 83                                            | 39           | 6             | 40           | 63            | 55           |
| 9           | 120                                           | 29           | 6             | 74           | 173           | 45           |
| 10          | 7                                             | 34           | 117           | 76           | 166           | 49           |
| Mean        | 45.3                                          | 31.8         | 38.6          | 66.6         | 76.6          | 46.2         |
| Variance    | 1774.2                                        | 60.2         | 2087.2        | 246.3        | 4643.6        | 52.6         |

\* Data represented here is obtained from three independent experiments

**Table S3.** Isolation of *S. sonnei* as a sole pathogen and in polymicrobial infections from diarrheal patients admitted to the Infectious Diseases Hospital, Kolkata, over the past five years

| Etiology                                                                                 | Frequency | Percentage   |
|------------------------------------------------------------------------------------------|-----------|--------------|
| <i>S. sonnei</i>                                                                         | 48        | 57.8         |
| <i>S. sonnei</i> + <i>Aeromonas</i> sp.                                                  | 1         | 1.2          |
| <i>S. sonnei</i> + <i>Campylobacter jejuni</i>                                           | 6         | 7.2          |
| <i>S. sonnei</i> + <i>Campylobacter jejuni</i> + EAEC                                    | 1         | 1.2          |
| <i>S. sonnei</i> +Adenovirus                                                             | 2         | 2.4          |
| <i>S. sonnei</i> +Astrovirus+ <i>Entamoeba histolytica</i>                               | 1         | 1.2          |
| <i>S. sonnei</i> + <i>Cryptosporidium</i> sp.                                            | 1         | 1.2          |
| <i>S. sonnei</i> +EAEC                                                                   | 2         | 2.4          |
| <i>S. sonnei</i> +EPEC                                                                   | 1         | 1.2          |
| <i>S. sonnei</i> + <i>Giardia lamblia</i>                                                | 3         | 3.6          |
| <i>S. sonnei</i> + <i>Giardia lamblia</i> + <i>Cryptosporidium</i> sp.                   | 1         | 1.2          |
| <i>S. sonnei</i> +Rotavirus                                                              | 2         | 2.4          |
| <i>S. sonnei</i> +Rotavirus+Adenovirus                                                   | 3         | 3.6          |
| <i>S. sonnei</i> +Sapovirus                                                              | 1         | 1.2          |
| <i>S. sonnei</i> +Sapovirus+Astrovirus                                                   | 1         | 1.2          |
| <i>S. sonnei</i> + <i>Vibrio cholera</i> Non O1 Non O139+ <i>Aeromonas</i> sp.           | 1         | 1.2          |
| <i>S. sonnei</i> + <i>Vibrio cholera</i> Non O1 Non O139+ <i>Campylobacter jejuni</i>    | 1         | 1.2          |
| <i>S. sonnei</i> + <i>Vibrio cholera</i> Non O1 Non O139                                 | 1         | 1.2          |
| <i>S. sonnei</i> + <i>Vibrio cholera</i> O1                                              | 2         | 2.4          |
| <i>S. sonnei</i> + <i>Vibrio cholera</i> O1+ <i>Entamoeba histolytica</i>                | 1         | 1.2          |
| <i>S. sonnei</i> + <i>Vibrio cholera</i> O1+Rotavirus                                    | 1         | 1.2          |
| <i>S. sonnei</i> + <i>Vibrio cholera</i> O1+Rotavirus+Adenovirus+ <i>Giradia lamblia</i> | 1         | 1.2          |
| <i>S. sonnei</i> + <i>Vibrio cholera</i> O1+Sapovirus                                    | 1         | 1.2          |
| <b>Total</b>                                                                             | <b>83</b> | <b>100.0</b> |
